# Supplementary material
Source: publisher figshare collection journal article supplement (https://acs.figshare.com/ndownloader/files/9482923)
Supplement: Supplementary file 1 [file 9482923]

# Supporting Information

## **Two-Dimensional Mesoporous Carbon Doped with Fe-N Active Sites for Efficient Oxygen Reduction**

Yifan Ye,<sup>†,‡</sup> Haobo Li,<sup>†,‡</sup> Fan Cai,<sup>†,‡</sup> Chengcheng Yan,<sup>†,‡</sup> Rui Si,<sup>§</sup> Shu Miao,<sup>†</sup> Yanshuo Li,<sup>\*,||</sup>  
Guoxiong Wang,<sup>\*,†</sup> and Xinhe Bao<sup>†</sup>

<sup>†</sup>State Key Laboratory of Catalysis, CAS Center for Excellence in Nanoscience, Dalian National Laboratory for Clean Energy, Dalian Institute of Chemical Physics, Chinese Academy of Sciences, Dalian 116023, China

<sup>‡</sup>University of Chinese Academy of Sciences, Beijing 100039, China

<sup>§</sup>Shanghai Synchrotron Radiation Facility, Shanghai Institute of Applied Physics, Chinese Academy of Sciences, Shanghai 201204, China

<sup>||</sup>School of Material Science and Chemical Engineering, Ningbo University, Ningbo 315211, China

*\*E-mail addresses: liyanshuo@nbu.edu.cn, wanggx@dicp.ac.cn.*

**Figure S1.** Doping energy of Fe atom into Zn atom sites of ZIF-7 framework, with the schematic diagram of the corresponding atomic structures. The energies of Fe and Zn atoms are in reference to their citrate complexes (ferric citrate and zinc citrate).

**Figure S2.** Doping energy of Fe atom into Zn atom sites of ZIF-7 framework, with the schematic diagram of the corresponding atomic structures.

**Figure S3.** (a) SEM and (b) HRSEM images of ZIF-(12, 8h).

**Figure S4.** (a) SEM and (b) HRSEM images of ZIF-(12, 16h).

**Figure S5.** SEM images of Fe@N-C-12.

**Figure S6.** High-resolution HADDF-STEM images of Fe@N-C-12.

**Figure S7.** Nitrogen adsorption–desorption isotherms of ZIF-7 derived catalysts with different AFC dosages after impregnation for 24 h.

**Figure S8.** Electron transfer number and  $\text{HO}_2^-$  selectivity of ZIF-7 derived catalysts with different impregnation durations.

**Figure S9.** Raman spectra of ZIF-7 derived catalysts with different impregnation durations.

**Figure S10** XRD patterns of ZIF-L, ZIF-(12, 24h), ZIF-(30, 24h) and ZIF-(60, 24h).

**Figure S11.** LSV curves of Fe@N-C-12 in  $\text{O}_2$ -saturated 0.1 M KOH solution at different rotation rates.

**Figure S12.** (a) The schematic diagram and (b) photograph of in situ XAS cell in working condition for ORR; (c-d) In situ XANES and EXAFS of Fe@N-C-12 under ORR test with different potentials.

**Table S1.** Fe content (wt%) of ZIF-7 derived catalysts with different impregnation durations as confirmed by ICP-OES.

**Table S2.** Porosity characters of ZIF-7 derived catalysts with different impregnation durations.

**Table S3.** Porosity characters of ZIF-7 derived catalysts with different AFC dosages.

**Table S4.** Fe content (wt%) of ZIF-7 derived catalysts with different AFC usages as confirmed by ICP-OES.

**Table S5.** Mass activities of different single-atom non-precious-metal catalysts in  $\text{O}_2$ -saturated 0.1 M KOH solution (1600 rpm)

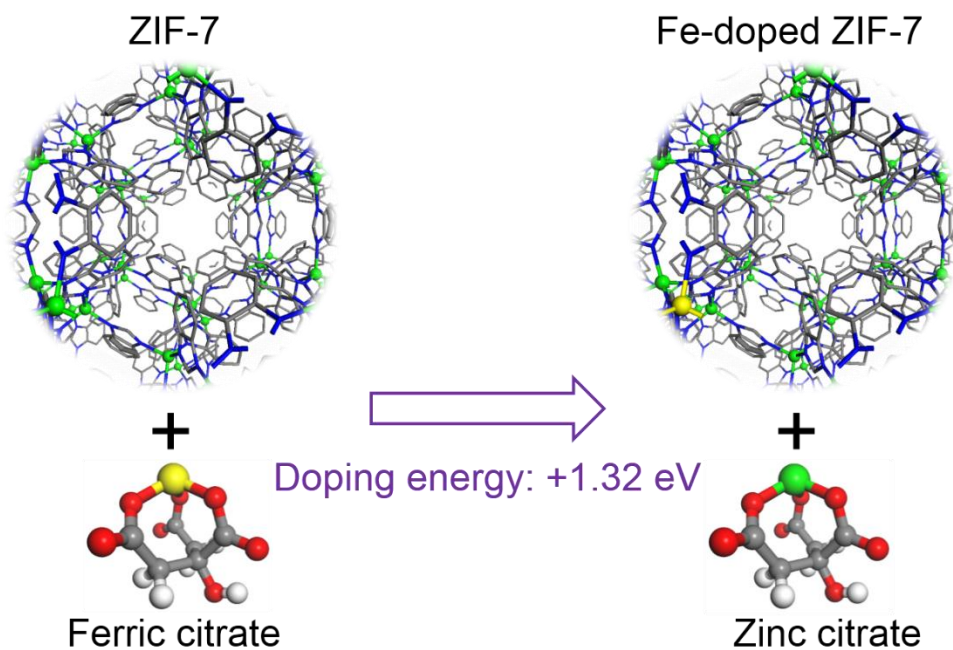

**Figure S1.** Doping energy of Fe atom into Zn atom sites of ZIF-7 framework, with the schematic diagram of the corresponding atomic structures. The energies of Fe and Zn atoms are in reference to their citrate complexes (ferric citrate and zinc citrate).

C: grey; N: blue; Zn: green; H: white; O: red; Fe: yellow.

The doping energy is calculated by:  $\Delta E_{\text{doping}} = E_{\text{total}} - [E(\text{ZIF-7}) - E(\text{Zn-citrate}) + E(\text{Fe-citrate})]$  where  $E_{\text{total}}$  is the energy of Fe-doped ZIF-7,  $E(\text{ZIF-7})$  is the energy of perfect ZIF-7,  $E(\text{Zn-citrate})$  and  $E(\text{Fe-citrate})$  are the energies of ferric citrate and zinc citrate complexes, respectively.

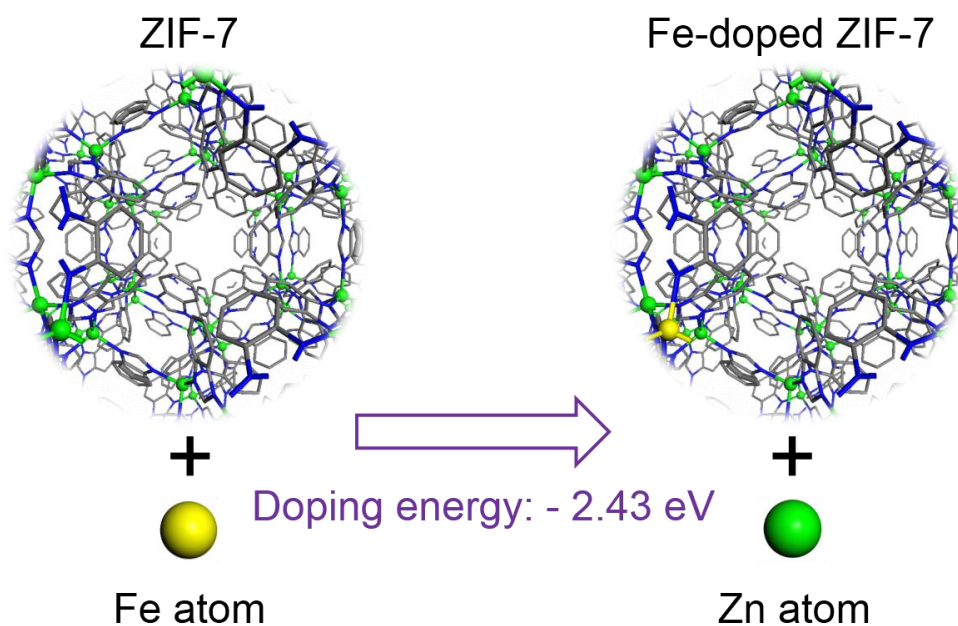

**Figure S2.** Doping energy of Fe atom into Zn atom sites of ZIF-7 framework, with the schematic diagram of the corresponding atomic structures. C: grey; N: blue; Zn: green; Fe: yellow.

The doping energy is calculated by:  $\Delta E_{\text{doping}} = E_{\text{total}} - [E(\text{ZIF-7}) - E(\text{Zn-atom}) + E(\text{Fe-atom})]$  where  $E_{\text{total}}$  is the energy of Fe-doped ZIF-7,  $E(\text{ZIF-7})$  is the energy of perfect ZIF-7,  $E(\text{Zn-atom})$  and  $E(\text{Fe-atom})$  are the energies of single Fe atom and Zn atom, respectively.

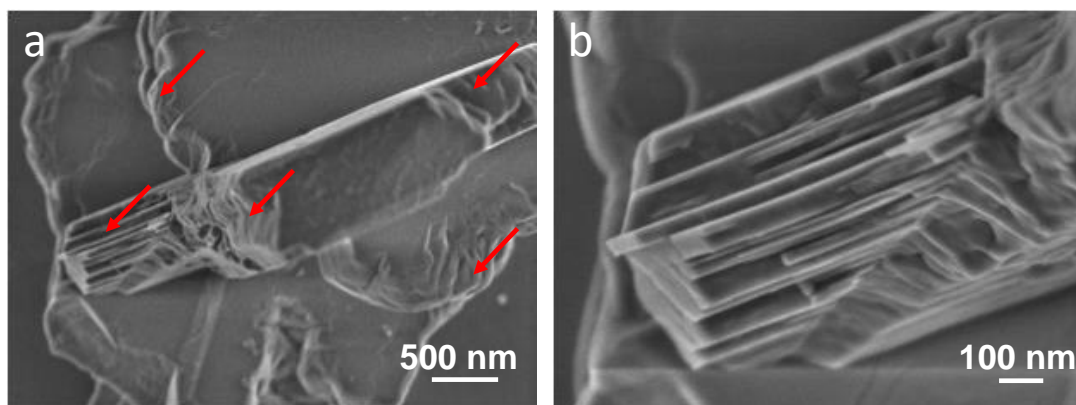

**Figure S3.** (a) SEM and (b) HRSEM images of ZIF-(12, 8h). The red arrows in Figure S3a show the self-assembly of 2D ZIF structure in the partially-transformed ZIF-(12, 8h).

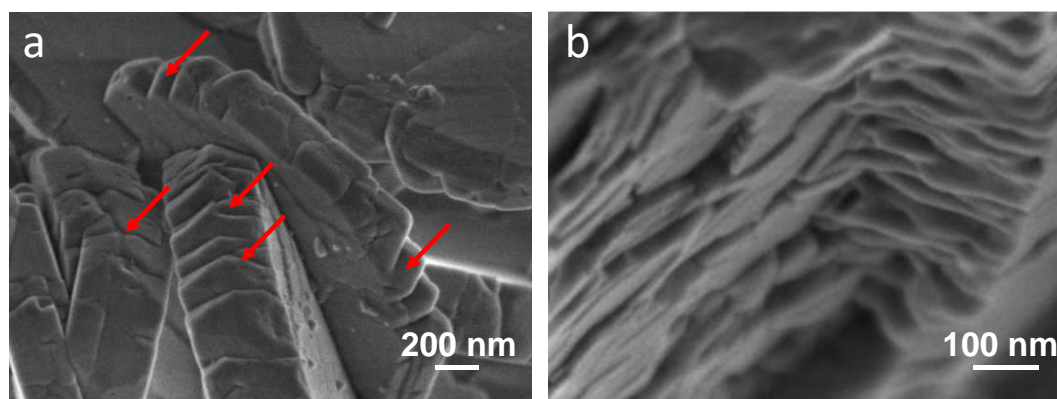

**Figure S4.** (a) SEM and (b) HRSEM images of ZIF-(12, 16h). The red arrows in Figure S4a show the self-assembly of 2D ZIF structure in the partially-transformed ZIF-(12, 16h).

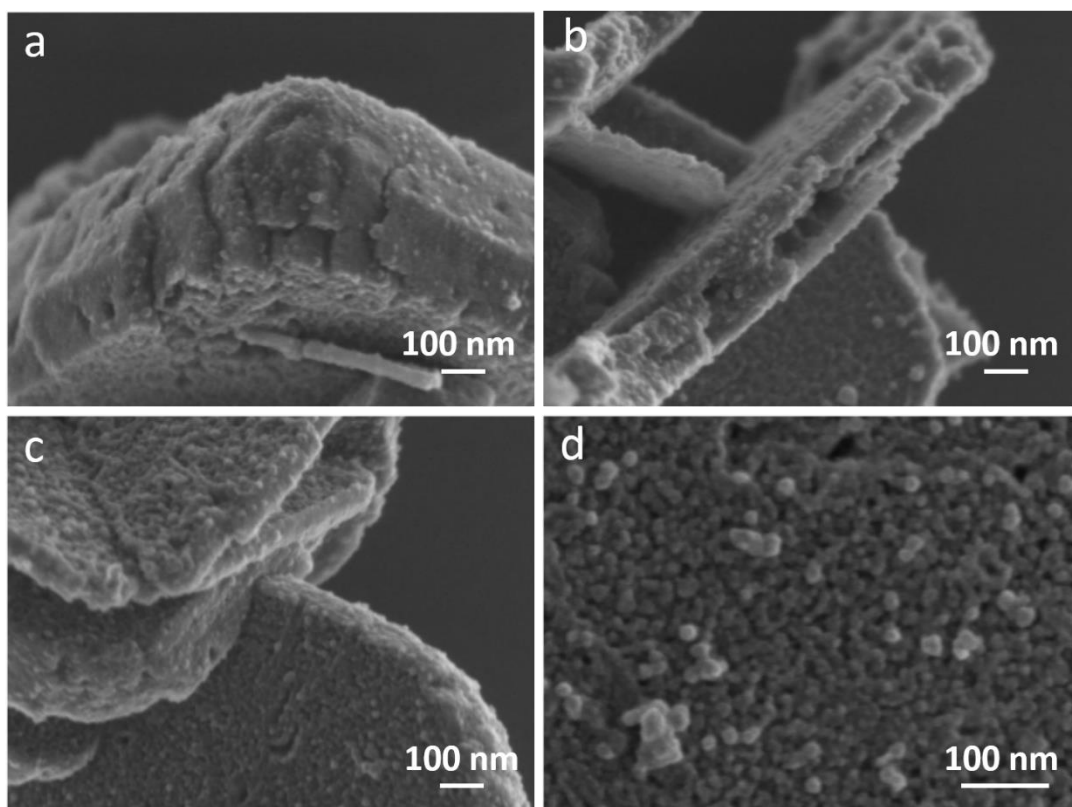

**Figure S5.** SEM images of Fe@N-C-12.

The SEM images of Fe@N-C-12 obviously show the highly porous structure with interconnected pores throughout the micrometer-length nanosheet.

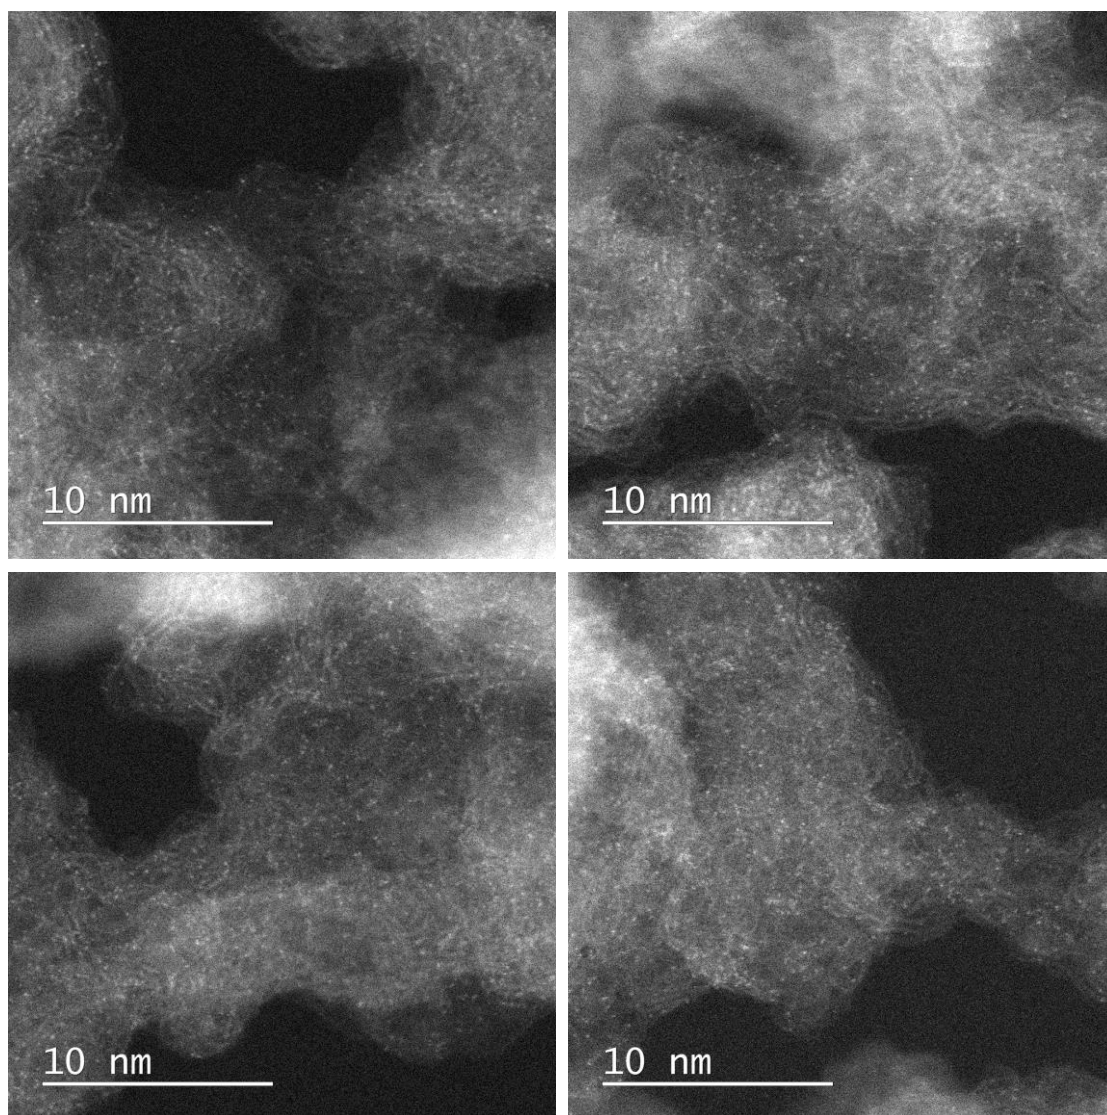

**Figure S6.** High-resolution HADDF-STEM images of Fe@N-C-12.

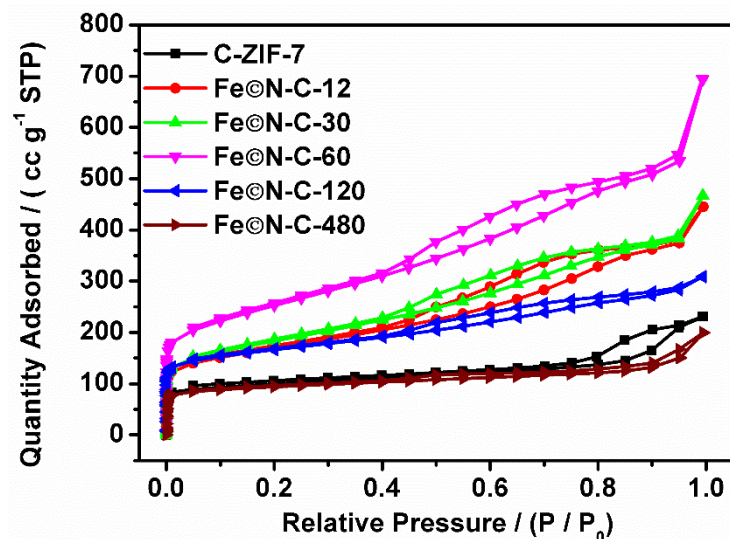

**Figure S7.** Nitrogen adsorption-desorption isotherms of ZIF-7 derived catalysts with different AFC dosages after impregnation for 24 h.

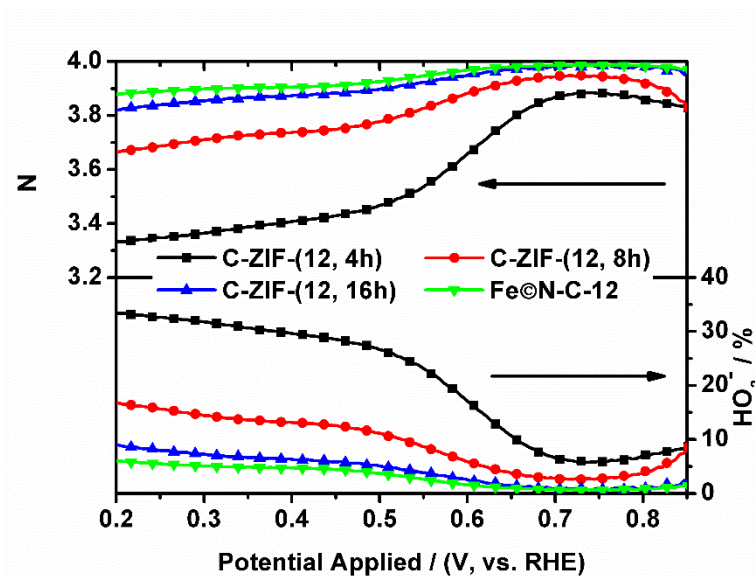

**Figure S8.** Electron transfer number and  $\text{HO}_2^-$  selectivity of ZIF-derived catalysts with different impregnation durations; Catalyst usages were all kept 61  $\mu\text{g}$ .



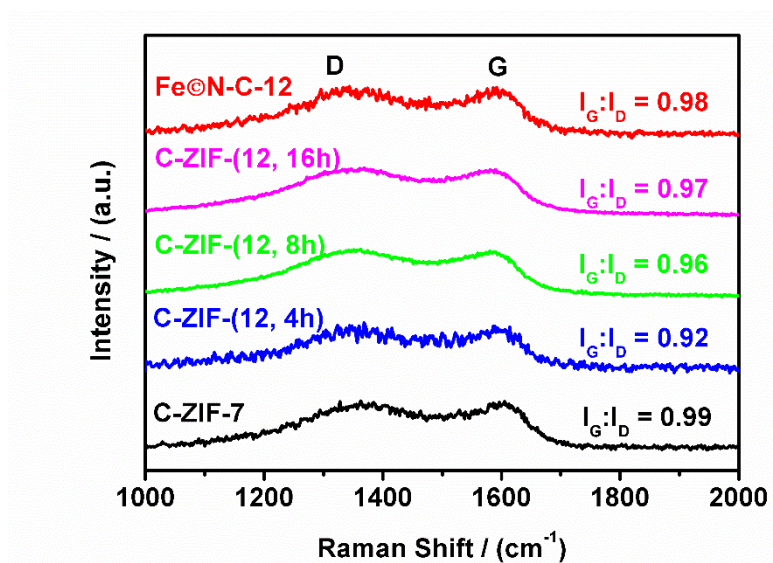

**Figure S9.** Raman spectra of ZIF-7 derived catalysts with different impregnation durations.

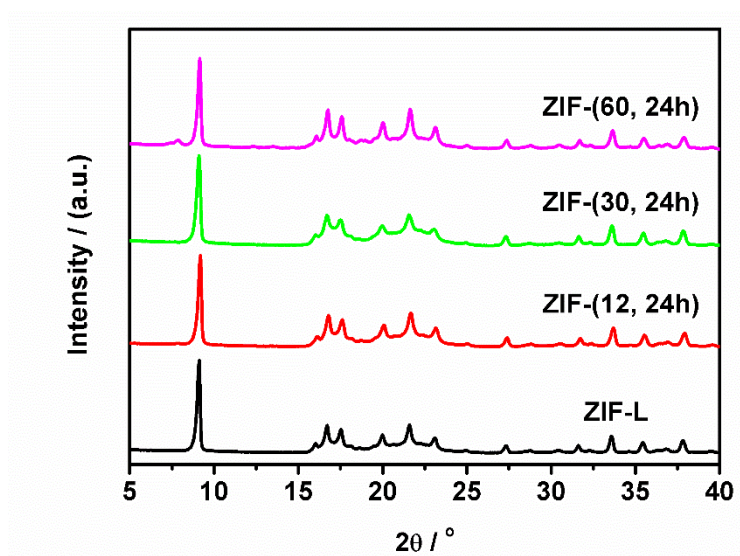

**Figure S10** XRD patterns of ZIF-L, ZIF-(12, 24h), ZIF-(30, 24h) and ZIF-(60, 24h).

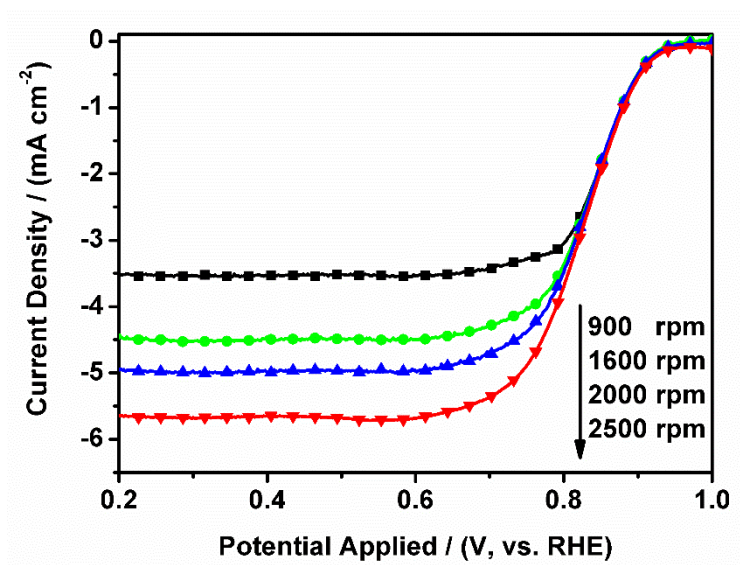

**Figure S11.** LSV curves of Fe@N-C-12 in O<sub>2</sub>-saturated 0.1 M KOH solution at different rotation rates.

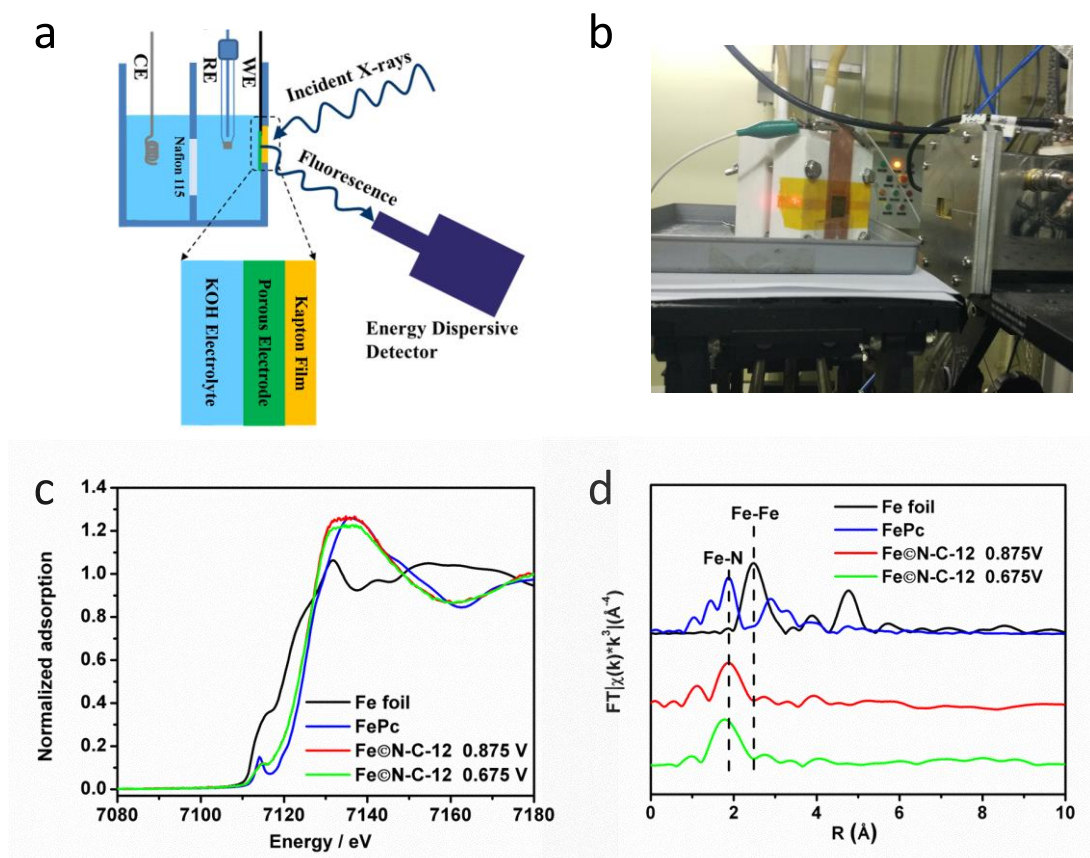

**Figure S12.** (a) The schematic diagram and (b) photograph of In situ XAS cell in working condition for ORR; (c-d) In situ XANES and EXAFS of Fe@N-C-12 under ORR test with different potentials (V, vs. RHE),  $R(\text{\AA})$ , distance in angstroms.  $k$ , wavenumber. All the data was obtained in  $\text{O}_2$ -saturated 0.1 M KOH solution.

**Table S1.** Fe content (wt%) of ZIF-7 derived catalysts with different impregnation durations as confirmed by ICP-OES.

| Samples       | Before pyrolysis | After pyrolysis & acid leaching |
|---------------|------------------|---------------------------------|
|               | Fe (wt%)         | Fe (wt%)                        |
| ZIF-7         | —                | —                               |
| ZIF-(12, 4h)  | 0.21             | 0.40                            |
| ZIF-(12, 8h)  | 0.20             | 0.37                            |
| ZIF-(12, 16h) | 0.19             | 0.38                            |
| ZIF-(12, 24h) | 0.22             | 0.37                            |

**Table S2.** Porosity characters of ZIF-7 derived catalysts with different impregnation durations.

| Catalyst        | BET surface area (m <sup>2</sup> g <sup>-1</sup> ) | Micropore surface area (m <sup>2</sup> g <sup>-1</sup> ) | External surface area (m <sup>2</sup> g <sup>-1</sup> ) | V <sub>total</sub> (cc g <sup>-1</sup> ) <sup>[a]</sup> | V <sub>μ</sub> (cc g <sup>-1</sup> ) <sup>[b]</sup> | ΔV (cc g <sup>-1</sup> ) <sup>[c]</sup> |
|-----------------|----------------------------------------------------|----------------------------------------------------------|---------------------------------------------------------|---------------------------------------------------------|-----------------------------------------------------|-----------------------------------------|
| C-ZIF-7         | 356.9                                              | 226.1                                                    | 130.8                                                   | 0.357                                                   | 0.097                                               | 0.260                                   |
| C-ZIF-(12, 4h)  | 384.1                                              | 116.1                                                    | 268.0                                                   | 0.452                                                   | 0.054                                               | 0.398                                   |
| C-ZIF-(12, 8h)  | 499.0                                              | 137.3                                                    | 361.7                                                   | 0.618                                                   | 0.064                                               | 0.554                                   |
| C-ZIF-(12, 16h) | 610.5                                              | 121.2                                                    | 489.3                                                   | 0.793                                                   | 0.058                                               | 0.735                                   |
| Fe©N-C-12       | 594.5                                              | 192.5                                                    | 402.0                                                   | 0.691                                                   | 0.089                                               | 0.602                                   |

[a] Total pore volume was calculated at P/P<sub>0</sub>=0.995;

[b] Micropore volume was calculated using t-plot method.

[c] ΔV means the difference between V<sub>total</sub> and V<sub>μ</sub>.

**Table S3.** Porosity characters of ZIF-7 derived catalysts with different AFC dosages.

| Catalyst   | BET<br>surface<br>area<br>(m <sup>2</sup> g <sup>-1</sup> ) | Micropore<br>surface area<br>(m <sup>2</sup> g <sup>-1</sup> ) | External<br>surface<br>area<br>(m <sup>2</sup> g <sup>-1</sup> ) | V <sub>total</sub><br>(cc g <sup>-1</sup> ) <sup>[a]</sup> | V <sub>μ</sub><br>(cc g <sup>-1</sup> ) <sup>[b]</sup> | ΔV<br>(cc g <sup>-1</sup> ) <sup>[c]</sup> |
|------------|-------------------------------------------------------------|----------------------------------------------------------------|------------------------------------------------------------------|------------------------------------------------------------|--------------------------------------------------------|--------------------------------------------|
| C-ZIF-7    | 356.9                                                       | 226.1                                                          | 130.8                                                            | 0.357                                                      | 0.097                                                  | 0.260                                      |
| Fe©N-C-12  | 594.5                                                       | 192.5                                                          | 402.0                                                            | 0.691                                                      | 0.089                                                  | 0.602                                      |
| Fe©N-C-30  | 644.2                                                       | 170.9                                                          | 473.3                                                            | 0.722                                                      | 0.078                                                  | 0.644                                      |
| Fe©N-C-60  | 888.9                                                       | 227.3                                                          | 661.6                                                            | 1.073                                                      | 0.105                                                  | 0.968                                      |
| Fe©N-C-120 | 594.8                                                       | 323.5                                                          | 271.3                                                            | 0.479                                                      | 0.141                                                  | 0.338                                      |
| Fe©N-C-480 | 346.5                                                       | 247.2                                                          | 99.3                                                             | 0.309                                                      | 0.103                                                  | 0.206                                      |

[a] Total pore volume was calculated at P/P<sub>0</sub>=0.995;

[b] Micropore volume was calculated using t-plot method.

[c] ΔV means the difference between V<sub>total</sub> and V<sub>μ</sub>.

**Table S4.** Fe content (wt%) of ZIF-7 derived catalysts with different AFC usages as confirmed by ICP-OES.

| Samples        | Before pyrolysis | After pyrolysis & acid leaching |
|----------------|------------------|---------------------------------|
|                | Fe (wt%)         | Fe (wt%)                        |
| ZIF-7          | —                | —                               |
| ZIF-(12, 24h)  | 0.22             | 0.37                            |
| ZIF-(30, 24h ) | 0.37             | 0.69                            |
| ZIF-(60, 24h)  | 0.42             | 0.87                            |
| ZIF-(120, 24h) | 0.47             | 0.82                            |
| ZIF-(480, 24h) | 1.13             | 2.38                            |

**Table S5.** Mass activities of different single-atom non-precious-metal catalysts in O<sub>2</sub>-saturated 0.1 M KOH solution (1600 rpm).

| Catalyst                 | metal loading<br>( $\mu\text{g}_{\text{metal}} \text{ cm}^{-2}$ ) | Activity @ 0.80V<br>( $\text{mA } \mu\text{g}_{\text{metal}}^{-1}$ ) | References |
|--------------------------|-------------------------------------------------------------------|----------------------------------------------------------------------|------------|
| Fe@N-C-12                | 1.15                                                              | 2.92                                                                 | This work  |
| Co SAs/N-C(900)          | 17.54                                                             | 0.33                                                                 | 1          |
| Fe-ISAs/CN               | 8.81                                                              | 0.64                                                                 | 2          |
| S,N-Fe/N/C-CNT           | 20.00                                                             | 0.24                                                                 | 3          |
| SA-Fe-NHPC               | 2.30                                                              | 1.67                                                                 | 4          |
| CNT/PC                   | 23.20                                                             | 0.23                                                                 | 5          |
| Fe-N/C-700               | 3.21                                                              | 1.48                                                                 | 6          |
| FeN <sub>2</sub> /NOMC-3 | 7.53                                                              | 0.59                                                                 | 7          |
| Fe-N <sub>x</sub> /HPC   | 1.55                                                              | 2.58                                                                 | 8          |
| Fe,N/PGC-30              | 6.22                                                              | 0.58                                                                 | 9          |

## References

1. Yin, P.; Yao, T.; Wu, Y.; Zheng, L.; Lin, Y.; Liu, W.; Ju, H.; Zhu, J.; Hong, X.; Deng, Z.; Zhou, G.; Wei, S.; Li, Y. *Angew. Chem. Int. Ed.* **2016**, *55*, 10800-10805.
2. Chen, Y.; Ji, S.; Wang, Y.; Dong, J.; Chen, W.; Li, Z.; Shen, R.; Zheng, L.; Zhuang, Z.; Wang, D.; Li, Y. *Angew. Chem. Int. Ed.* **2017**, *56*, 6937-6941.
3. Chen, P.; Zhou, T.; Xing, L.; Xu, K.; Tong, Y.; Xie, H.; Zhang, L.; Yan, W.; Chu, W.; Wu, C.; Xie, Y. *Angew. Chem. Int. Ed.* **2017**, *56*, 610-614.
4. Zhang, Z.; Gao, X.; Dou, M.; Ji, J.; Wang, F. *Small* **2017**, *1*, 1004-1009.
5. Sa, Y. J.; Seo, D.-J.; Woo, J.; Lim, J. T.; Cheon, J. Y.; Yang, S. Y.; Lee, J. M.; Kang, D.; Shin, T. J.; Shin, H. S.; Jeong, H. Y.; Kim, C. S.; Kim, M. G.; Kim, T.-Y.; Joo, S. H. *J. Am. Chem. Soc.* **2016**, *138*, 15046-15056.
6. Yang, Z. K.; Lin, L.; Xu, A.-W. *Small* **2016**, *12*, 5710-5719.

7. Shen, H.; Gracia-Espino, E.; Ma, J.; Tang, H.; Mamat, X.; Wagberg, T.; Hu, G.; Guo, S. *Nano Energy* **2017**, *35*, 9-16.
8. Zhang, Z.; Gao, X.; Dou, M.; Ji, J.; Wang, F. *J. Mater. Chem. A* **2017**, *5*, 1526-1532.
9. Gu, W.; Hu, L.; Li, J.; Wang, E. *J. Mater. Chem. A* **2016**, *4*, 14364-14370.
